# Supplementary material for: Caffeine inhibits gene conversion by displacing Rad51 from ssDNA
Source: PubMed Central journal article supplement (PMC4538809; doi:10.1093/nar/gkv525), 2015-05-27
Supplement: supp_gkv525_nar-03490-d-2014-File012.pdf [file supp_gkv525_nar-03490-d-2014-File012.pdf]

## Supporting information

Figure S1

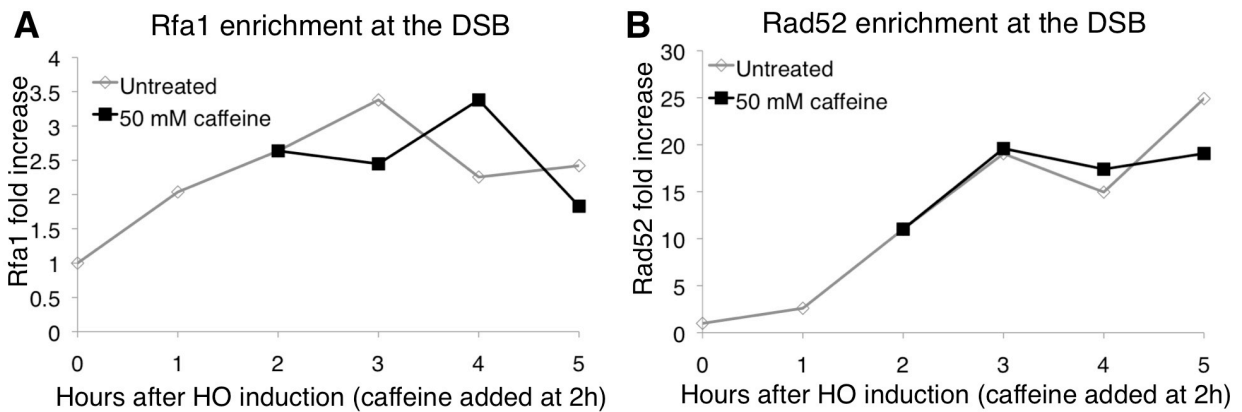

Supplemental Figure 1 – Caffeine treatment does not lead to loss of Rfa1 or Rad52 from ssDNA

A) Rfa1 ChIP at Chr 6 DSB (irreparable) in strain YML002. ChIP signal measured 5 kb proximal to the DSB.

B) Rad52 ChIP 5 kb proximal to the DSB at *MAT* in JKM179. ChIP signal measured 5 kb proximal to the DSB at *MAT*.

Figure S2

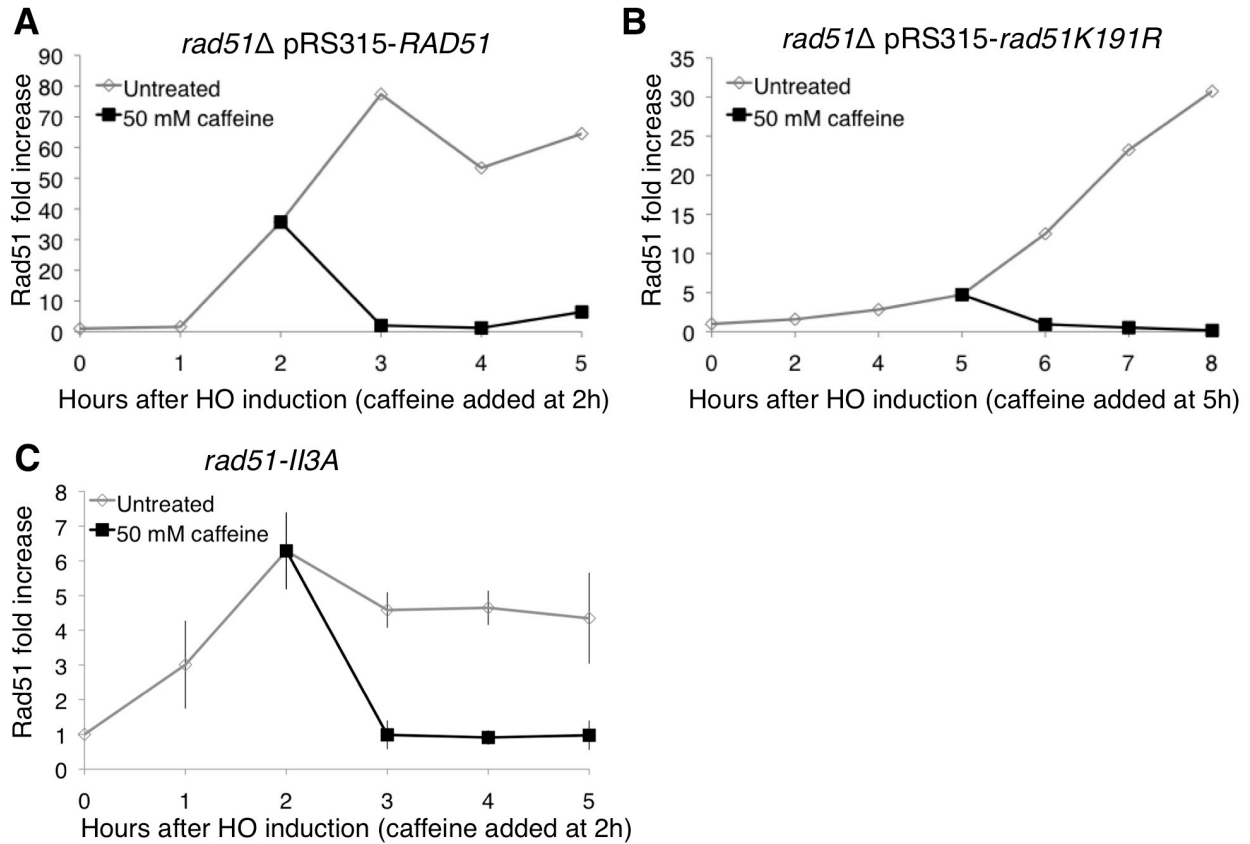

Supplemental Figure 2

A) Rad51 loading on ssDNA. Rad51 is expressed from a single copy centromere containing plasmid. WT *RAD51* is deleted. ChIP signals measured 5 kb from the DSB.

B) *rad51-K191R* loading on ssDNA. *rad51-K191R* is expressed from a single copy centromere containing plasmid. WT *RAD51* is deleted. ChIP signals measured 5 kb from the DSB.

C) Rad51 ChIP 5 kb from a DSB at *MAT* in a donorless *rad51-II3A* strain. 50 mM caffeine added 2 h after HO induction. Error bars represent ranges.

Figure S3

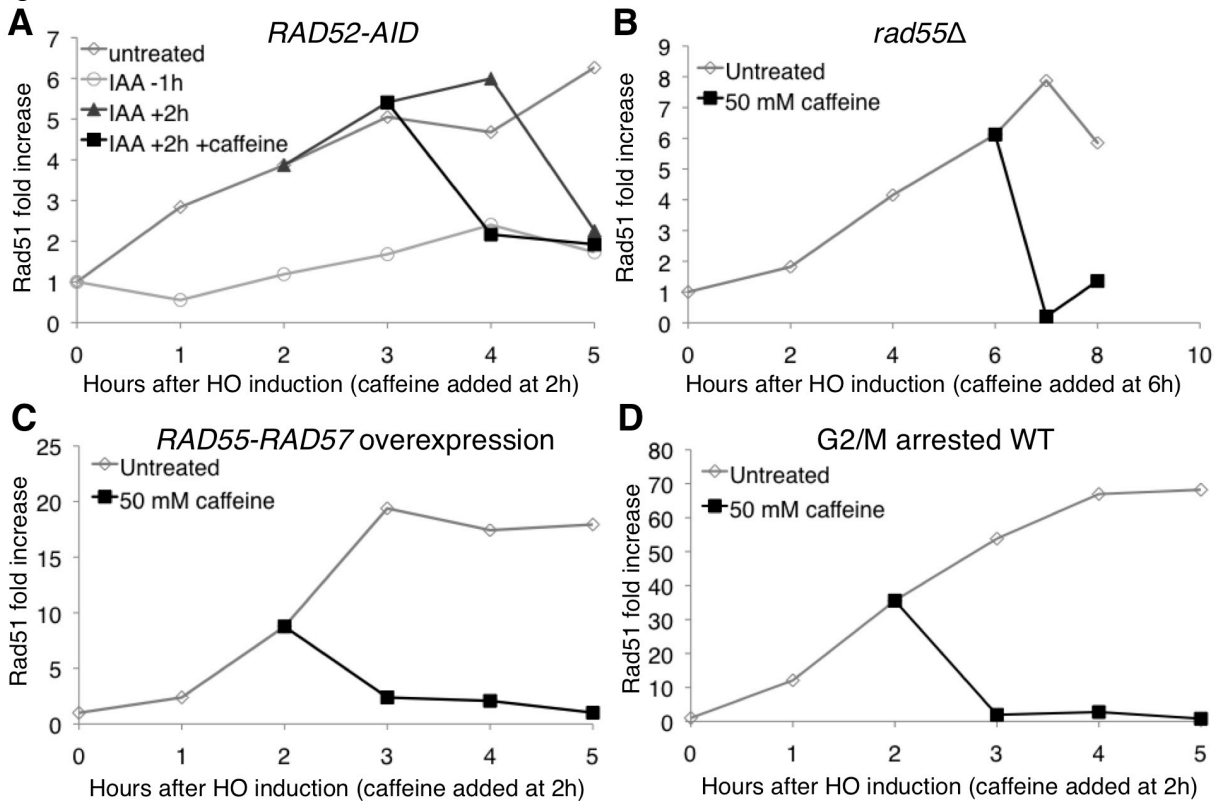

Supplemental Figure 3 - Caffeine treatment leads to Rad51 eviction independently of factors that facilitate Rad51 filament formation.

A) Rad51 loading 5 kb from the DSB in a strain containing Rad52 with an auxin inducible degenon (AID). 500  $\mu$ M indole-3-acetic acid (IAA) added to the media 1 h before HO induction (blank diamonds) or 2 h after HO induction (triangles). 50 mM caffeine added 1 h after IAA treatment (3 h after HO induction).

B) Rad51 loading in 5 kb from the DSB in a *rad55Δ* strain. 50 mM caffeine were added 6 h after HO induction.

C) Rad51 loading 5 kb from the DSB in a in a strain containing Rad55-Rad57 overexpressing plasmid. 50 mM caffeine were added 2 h after HO induction.

D) Caffeine evicts Rad51 in cells arrested in nocodazole. 15  $\mu$ g/ml nocodazole added to the media 3 h prior to HO induction (95% dumbbells). 50 mM caffeine added 2 h after HO induction.

Figure S4

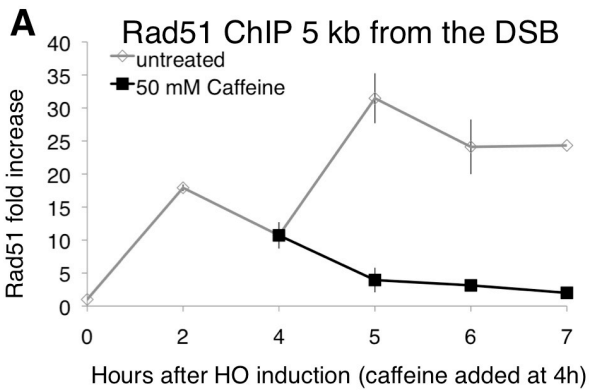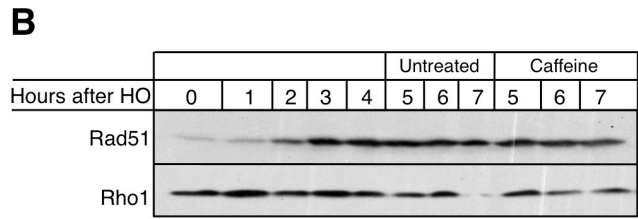

Supplemental Figure 4 – Caffeine evicts Rad51 without lowering Rad51 protein levels

A) Rad51 loading 5 kb from the DSB in a donorless strain. 50 mM caffeine were added 4 h after HO induction. Error bars represent ranges.

B) Western blot for Rad51. 50 mM caffeine were added 4 h after HO induction.

**Table I – Strain list**

| Strain name | Genotype                                                                                                                                         |
|-------------|--------------------------------------------------------------------------------------------------------------------------------------------------|
| JKM179      | <i>hoΔ hml::ADE1 MATα hmr::ADE1 ade1-110 leu2,3-112 lys5 trp1::hisG ura3-52 ade3::GAL:HO</i>                                                     |
| JKM139      | <i>JKM179 isogenic, MATα</i>                                                                                                                     |
| YML002      | <i>JKM139 (HO cut site deleted) Cen3HOcs::HPH 2 kb homology to the left of the HOcs inserted to the right of Cen3, 97700-97800 Ch6::HOcs-NAT</i> |
| tGI354      | <i>JKM139 MATα-inc (+CA), arg5,6::MATα-HPH</i>                                                                                                   |
| MT03        | <i>hoΔ HMLα MATα HMRα-BamHI::URA3 ade1 leu2 trp1::hisG ura3-52 ade3::GAL:HO</i>                                                                  |
| YJL112      | <i>MT03 tel1::TRP1 mec1::NAT sml1::KAN</i>                                                                                                       |
| YFD0918     | <i>JKM179 atg1::KAN</i>                                                                                                                          |
| YFD0247     | <i>JKM139 srs2::LEU2</i>                                                                                                                         |
| AWY313      | <i>JKM179 sgs1::KAN</i>                                                                                                                          |
| YSL305      | <i>JKM139 rad55::LEU2</i>                                                                                                                        |
| MT101       | <i>JKM139 ura3-52::TIR-LEU2 rad52-AID::KAN</i>                                                                                                   |
| MT104       | <i>JKM179 RAD52-FLAG::KAN</i>                                                                                                                    |
| MT109       | <i>JKM179 pADH1-RAD51 LEU2 2 μ</i>                                                                                                               |
| MT113       | <i>JKM179 pRAD55-RAD57 URA3 2 μ</i>                                                                                                              |
| MT121       | <i>tGI354 pADH1-RAD51</i>                                                                                                                        |
| MT123       | <i>JKM179 rad51::HPH pRAD51-LEU2</i>                                                                                                             |
| MT124       | <i>JKM179 rad51::HPH prad51K191R-LEU2</i>                                                                                                        |
| MT127       | <i>hoΔ HMLα MATα hmr::ADE1 ade1-110 leu2,3-112 lys5 trp1::hisG ura3-52 ade3::GAL:HO rad54::KAN rdh54::URA3 uls1::LEU2</i>                        |
| MT151       | <i>JKM179 RAD51-II3A::TRP1</i>                                                                                                                   |
